# Supplementary material for: 2-(Penta-1,3-diynyl)-5-(3,4-dihydroxybut-1-ynyl)thiophene, a Novel NQO1 Inducing Agent from Echinops grijsii Hance
Source: PubMed Central journal article supplement (PMC6257798; doi:10.3390/molecules15085273), 2010-08-03

**Table 1S.**  $^1\text{H}$  and  $^{13}\text{C}$  NMR data of PDDYT (in  $\text{CD}_3\text{OD}$ ).

| Position | $\delta_{\text{H}}$    | $\delta_{\text{C}}$ |
|----------|------------------------|---------------------|
| 2        |                        | 123.3               |
| 3        | 7.14 (d, $J = 4.0$ Hz) | 133.6               |
| 4        | 7.07 (d, $J = 4.0$ Hz) | 131.9               |
| 5        |                        | 124.6               |
| 1'       |                        | 78.9                |
| 2'       |                        | 63.3                |
| 3'       |                        | 65.5                |
| 4'       |                        | 83.2                |
| 5'       | 2.02 (s)               | 2.9                 |
| 1''      |                        | 76.9                |
| 2''      |                        | 93.2                |
| 3''      | 4.55 (t, $J = 6.0$ Hz) | 63.3                |
| 4''      | 3.67 (m)               | 65.6                |

**Figure 1S.** The key HMBC correlations of PDDYT.

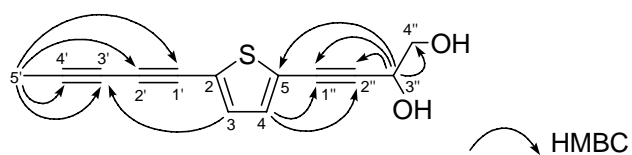

**Figure 2S.** The  $^1\text{H}$  NMR (500 MHz,  $\text{CDCl}_3$ ) and  $^{13}\text{C}$  NMR (125 MHz,  $\text{CDCl}_3$ ) spectra of PDDYT.

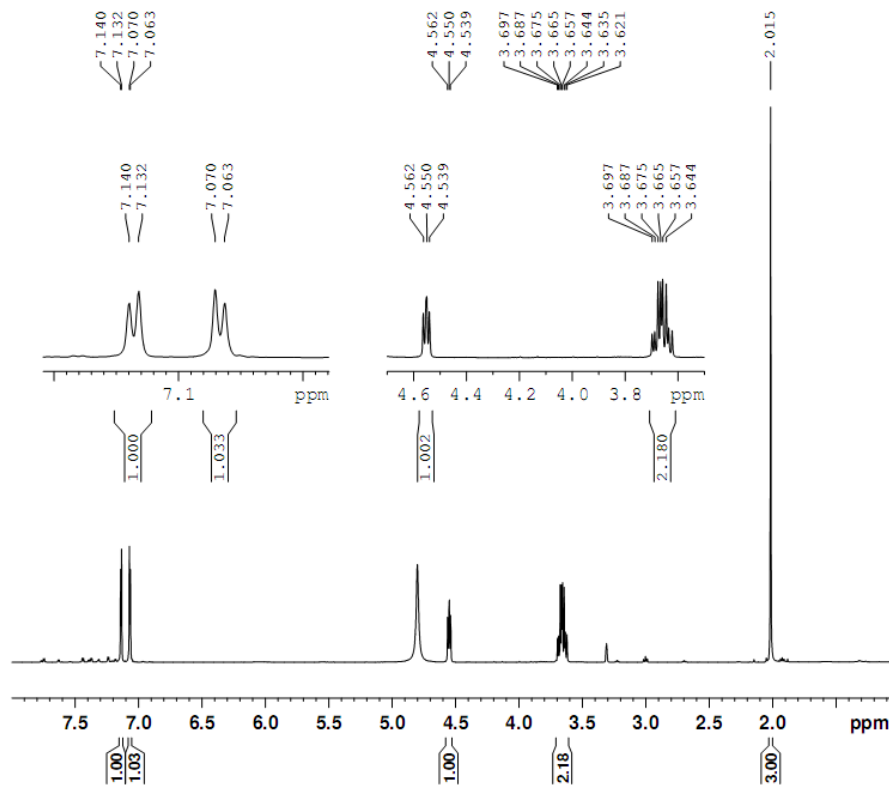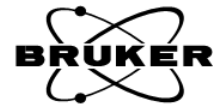

```

NAME      ES-zxy-63-Em
EXPNO    1
PROCNO   1
Date_    20090708
Time     9.05
INSTRUM  spect
PROBHD   5 mm PABBO BB-
PULPROG  zg30
TD        65536
SOLVENT  MeOD
NS        16
DS        2
SWH       10330.578 Hz
FIDRES   0.157632 Hz
AQ        3.1719923 sec
RG         57
DM        48.400 usec
DE        6.50 usec
TE        299.9 K
D1        1.00000000 sec
TD0       1

===== CHANNEL f1 =====
NUC1      1H
P1         16.71 usec
PL1        3.00 dB
PL1W      12.56407547 W
SF01      500.1330885 MHz
SI         32768
SF         500.1300086 MHz
WDW        EM
SSB         0
LB         0.30 Hz
GB         0
PC         1.00
    
```

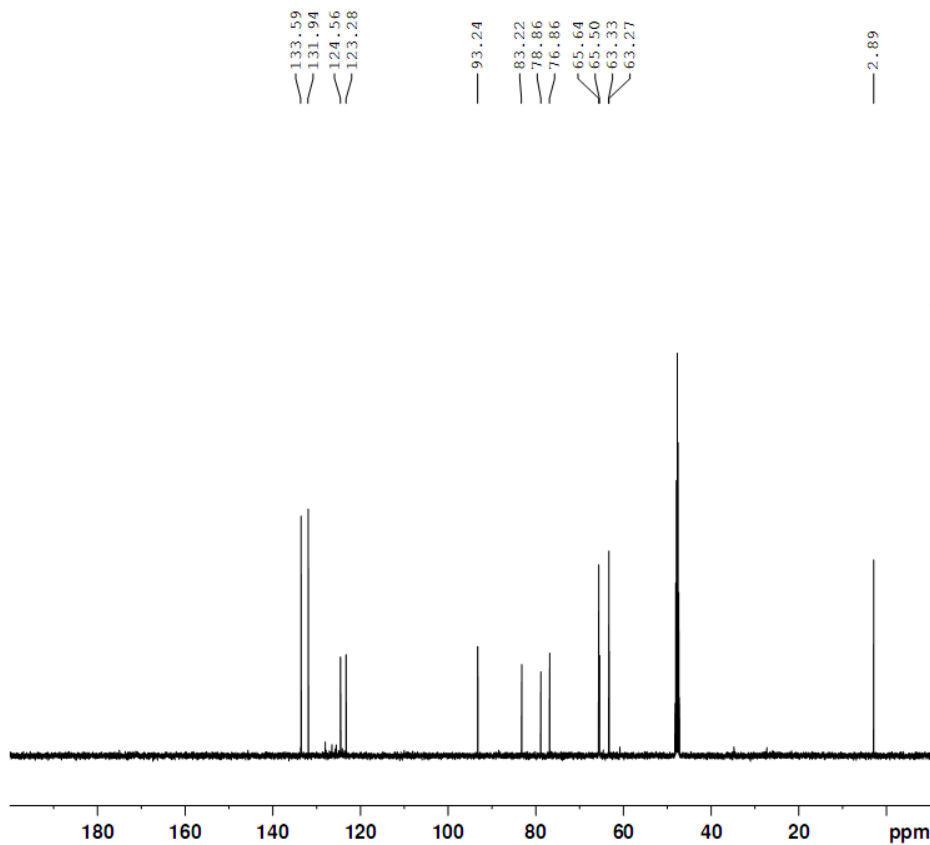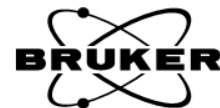

```

NAME      ES-zxy-63-Em
EXPNO    3
PROCNO   1
Date_    20090708
Time     9.18
INSTRUM  spect
PROBHD   5 mm PABBO BB-
PULPROG  zgpg30
TD        65536
SOLVENT  MeOD
NS        50
DS        4
SWH       29761.904 Hz
FIDRES   0.454131 Hz
AQ        1.1019548 sec
RG        2050
DM        16.800 usec
DE        6.50 usec
TE        300.0 K
D1        2.00000000 sec
D11       0.03000000 sec
TD0       1

===== CHANNEL f1 =====
NUC1      13C
P1         10.19 usec
PL1        3.00 dB
PL1W      46.07667160 W
SF01      125.7703643 MHz

===== CHANNEL f2 =====
CPDPRG2  waltz16
NUC2      1H
PCPD2    80.00 usec
PL2       3.00 dB
PL12     16.60 dB
PL13     18.00 dB
PL2W     12.56407547 W
PL12W    0.54844177 W
PL13W    0.39731094 W
SF02     500.1320005 MHz
SI         32768
SF        125.7577890 MHz
WDW        EM
SSB         0
LB         1.00 Hz
GB         0
PC         1.40
    
```

Figure 3S. The HSQC and HMBC spectra of PDDYT.

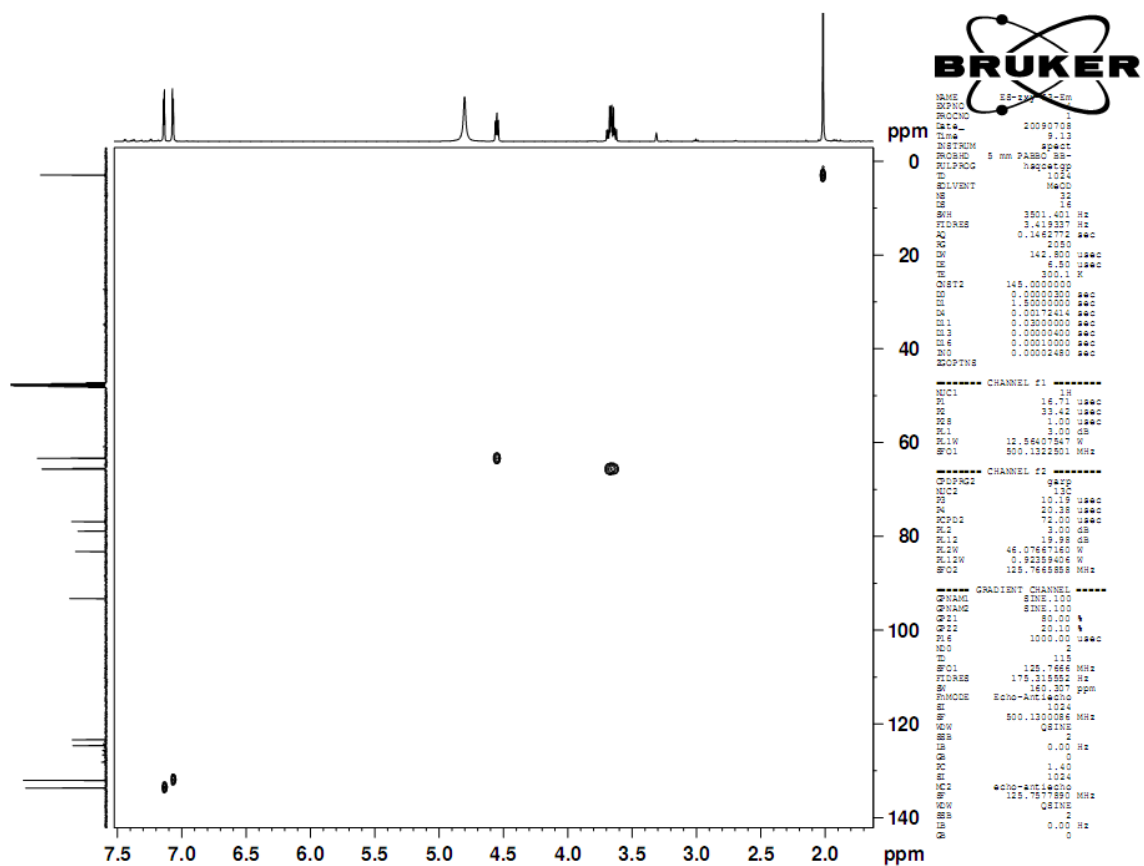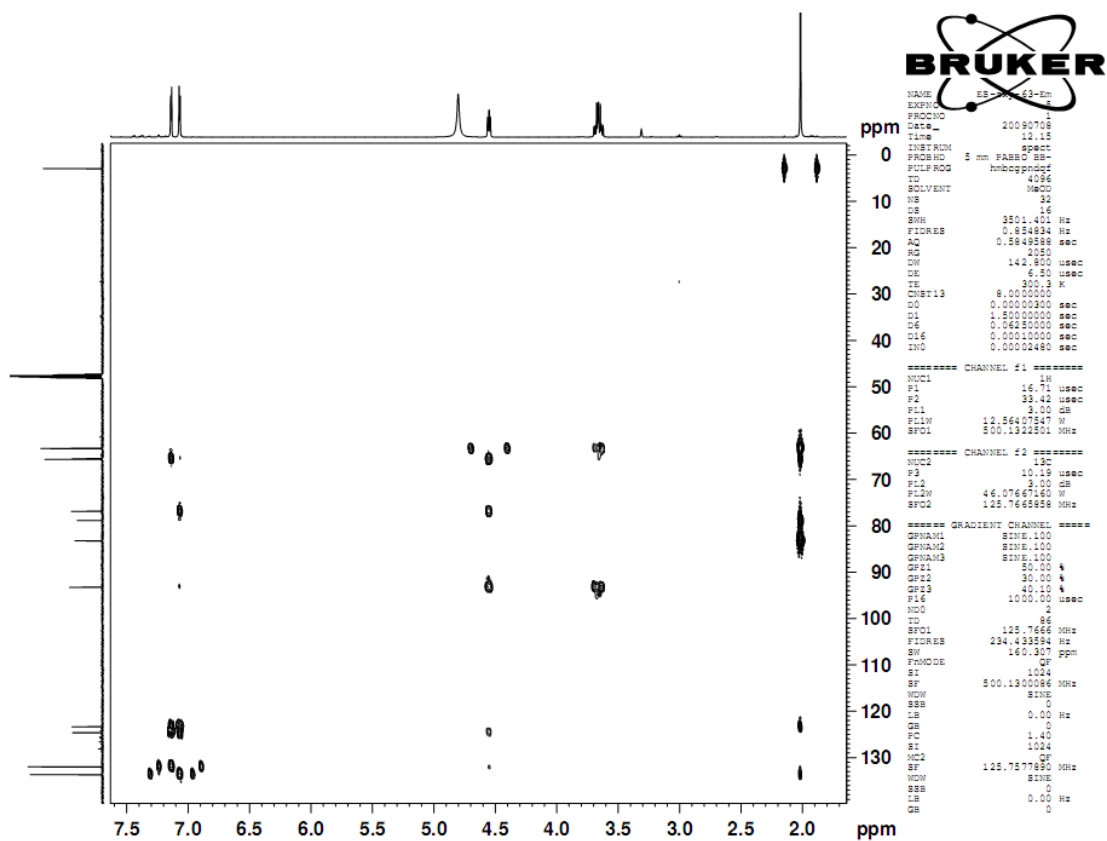

**Figure 4S.** HPLC analysis of the purity of PDDYT. UV  $\lambda = 280$  nm.

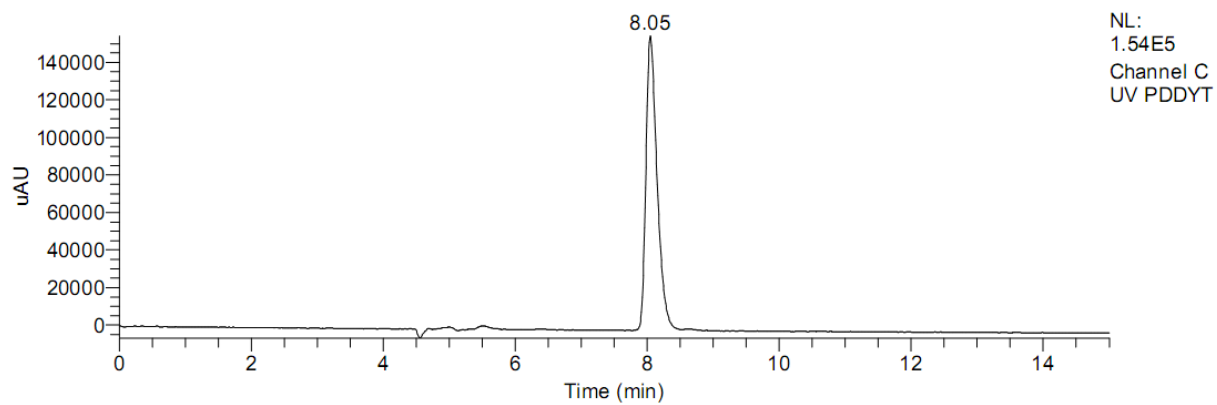

Supplement: molecules-15-05273-s001.pdf [file molecules-15-05273-s001.pdf]
